# Supplementary material for: Layer-resolving ability and model analysis of LIBS for multilayer samples with a four-layer structure under different focusing conditions
Source: Royal Society of Chemistry journal article supplement (doi:10.1039/d5ja00034c), 2025-01-01
Supplement: d5ja00034c2.pdf [file d5ja00034c2.pdf]

**Supplementary Information for Layer-resolving ability and model analysis of LIBS for multilayer samples with a four-layer structure under different focusing conditions (Part 2 of 3)**

Shiming Liu, Cong Li\*, Qi He, Boliang Men, Ding Wu, Ran Hai, Xingwei Wu, Hongbin Ding

*Key Laboratory of Materials Modification by Laser, Ion, and Electron Beams (Ministry of Education), School of Physics, Dalian University of Technology, Dalian 116024, People's Republic of China*

\*E-mail of the corresponding author: [cli@dlut.edu.cn](mailto:cli@dlut.edu.cn)

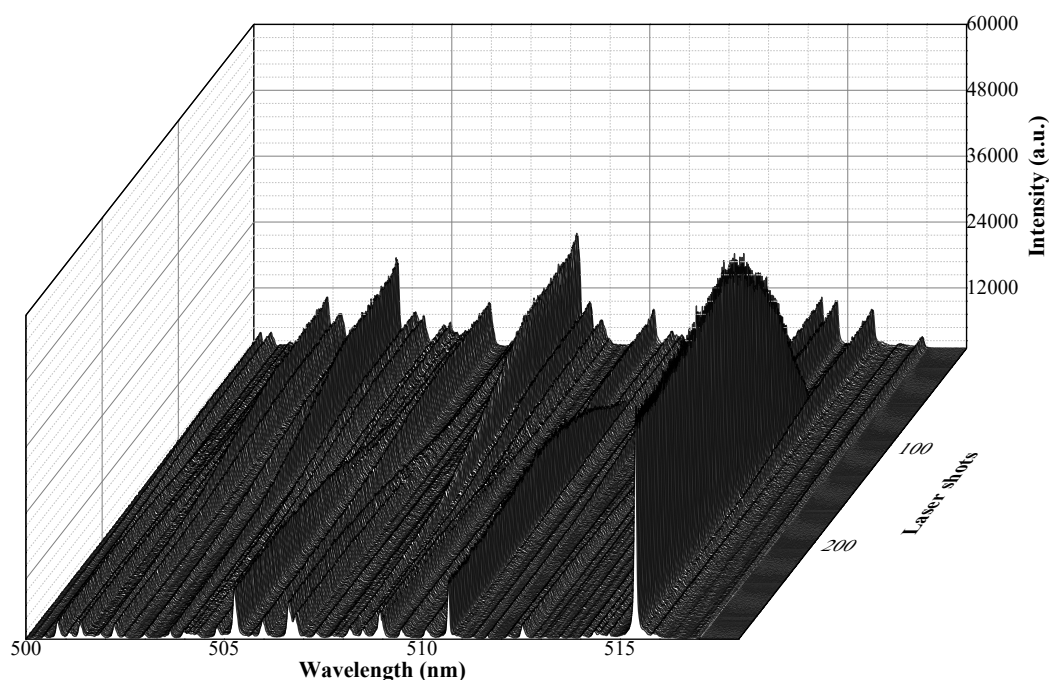

Figure. S6. Typical spectra of sample S2 at  $\Delta L = 9$  cm.

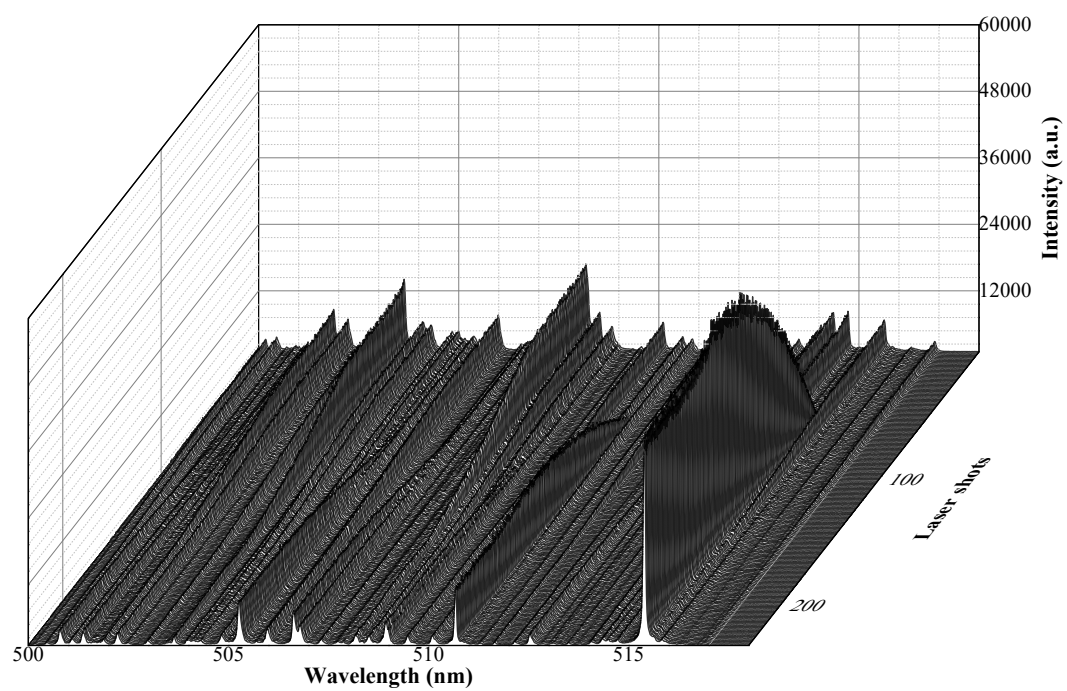

Figure. S7. Typical spectra of sample S2 at  $\Delta L = 8$  cm.

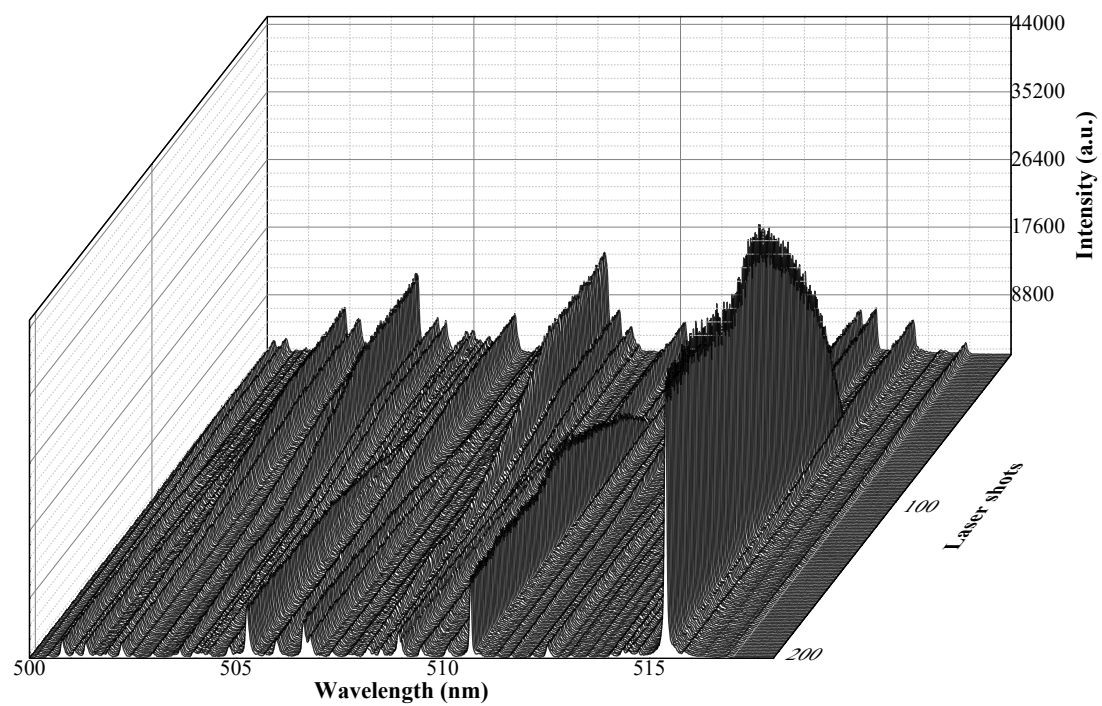

Figure. S8. Typical spectra of sample S2 at  $\Delta L = 7$  cm.

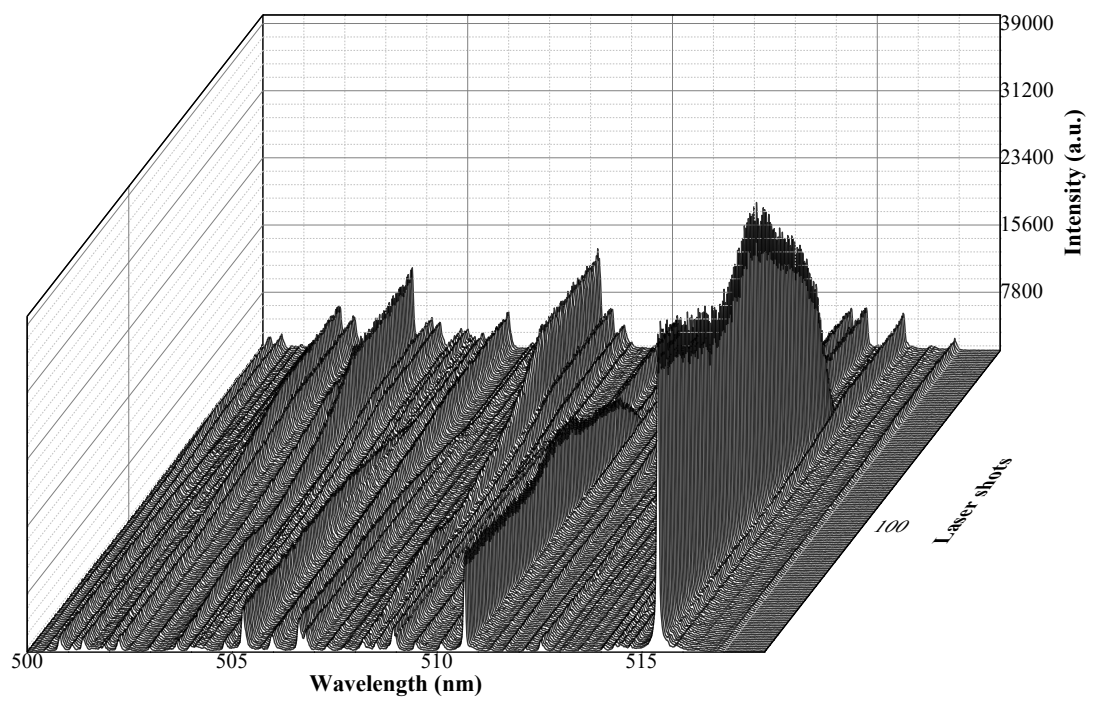

Figure. S9. Typical spectra of sample S2 at  $\Delta L = 6$  cm.

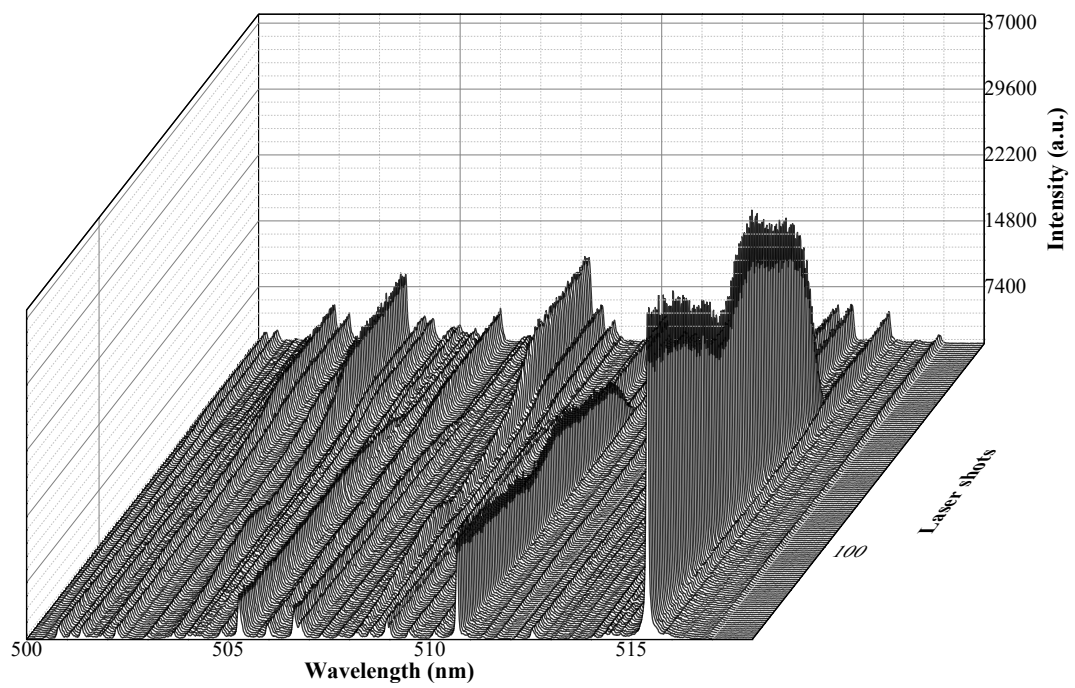

Figure. S10. Typical spectra of sample S2 at  $\Delta L = 5$  cm.
